# Supplementary material
Source: Preprints.org preprint supplement (doi:10.20944/preprints202011.0246.v1)
Supplement: Supplementary file 1 [file Cover%20Letter%20to%20Animals%20Journal%20Editor.pdf]

**Editor-in-Chief,**  
**Animals Journal,**  
MDPI Journals

Date: November 3<sup>rd</sup>, 2020

Ref.: A research article entitled: **“Galway Point Mutation (FecX<sup>G</sup>) in the Bone Morphogenetic Protein 15 Gene (BMP15) is Associated with Prolificacy in the Sudanese Desert Sheep Ecotypes”**

Dear Sir,

The above article is submitted for publication in the *Animals Journal*. The study tested the association between FecX<sup>G</sup> point mutation located in exon 2 of BMP15 gene and the prolificacy of Dubasi, Shugor and Watish sheep ecotypes, under dryland farming, Sudan. These sheep ecotypes comprise the mainstay of Sudan export and local livestock trade. The presence of one copy of FecX<sup>G</sup> point mutation of BMP15 gene increased the litter size by 0.17 lambs in the studied ecotypes.

We hereby confirm that neither the manuscript nor any parts of its content are currently under consideration or published in another journal.

Looking forward to hearing from you soon, we remain

Sincerely,



**Faisal M. El-Hag (PhD),**  
(corresponding author)  
Visiting Researcher,  
Arid Land Research Center (ALRC),  
Tottori University,  
Japan.  
Email: [faisalelhag@hotmail.com](mailto:faisalelhag@hotmail.com)  
<https://orcid.org/0000-0003-3523-4678>  
Tel: +81 70 4100 2079
